# Supplementary material for: The TMSB4 Pseudogene LncRNA Functions as a Competing Endogenous RNA to Promote Cartilage Degradation in Human Osteoarthritis
Source: PubMed Central journal article supplement — Mol Ther. 2016 Aug 30;24(10):1726–33. doi: 10.1038/mt.2016.151 (PMC5112043; doi:10.1038/mt.2016.151), 2016-08-30
Supplement: mt2016151x1.pdf [file mt2016151x1.pdf]

## **The TMSB4 Pseudogene LncRNA Functions as a Competing Endogenous RNA to Promote Cartilage Degradation**

Qiang Liu<sup>1</sup>, Xiaoqing Hu<sup>1</sup>, Xin Zhang<sup>1</sup>, Linghui Dai<sup>1</sup>, Xiaoning Duan<sup>1</sup>, Chunyan Zhou<sup>2</sup>, Yingfang Ao<sup>1\*</sup>

1 Institute of Sports Medicine, Beijing Key Laboratory of Sports Injuries, Peking University Third Hospital, 49 North Garden Road, Haidian District, Beijing 100191, P. R. China.

2 Department of Biochemistry and Molecular Biology, Peking University School of Basic Medical Sciences, 38 Xueyuan Road, Haidian District, Beijing 100191, P. R. China.

Correspondence authors' Address:

\*Institute of Sports Medicine, Peking University Third Hospital, 49 North Garden Road, Haidian District, Beijing 100191, P. R. China. (Yingfang Ao, MD)

Fax number: 86-10-62010440; Tel. 86-10-82267390; Email: yingfang.ao@gmail.com;

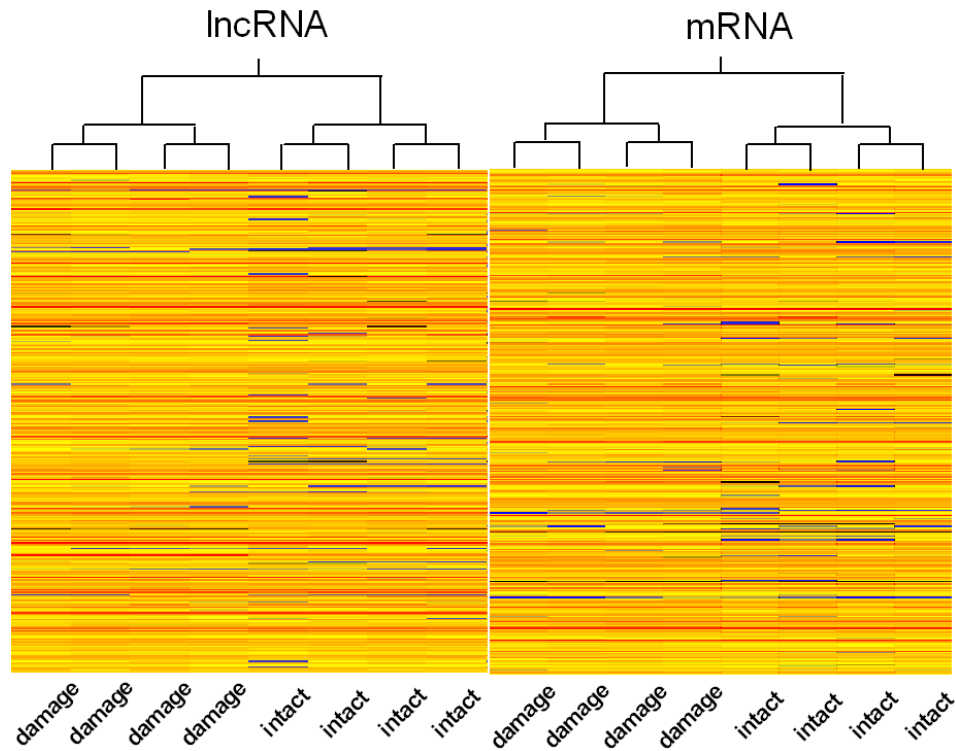

**Supplementary figure 1.** The differential expression of lncRNAs in the different regions. A hierarchical clustering analysis of the lncRNAs and mRNAs that were differentially expressed between the intact and the damaged region of the cartilage samples. Each group contains 4 individuals (greater than two-fold;  $p < 0.05$ ). The expression values are represented in different colors, which indicates expression above and below the median expression value across all samples.

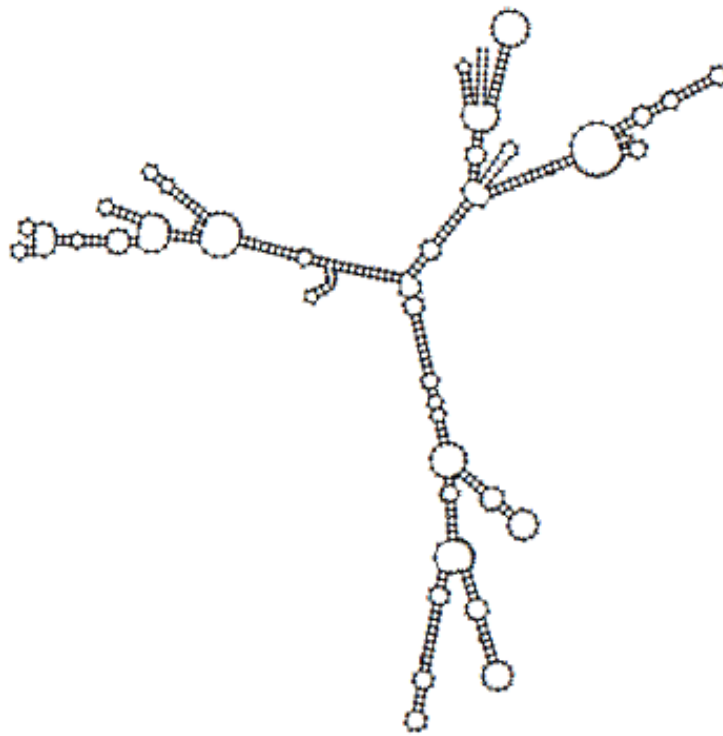

**Supplementary figure 2.** The secondary structure of lncRNA-MSR was predicted using RNAFOLD.

**Open-reading frames (ORFs) analysis**

TMSB4X pseudogene lncRNA 144, 325, 469 (+)

ATGACTGTGCTGCCCCTTTCACATCAAAGAACTACTGACAACGAAGGCCG

CGACTGCCTCTCCCATCTGTCTATCTGGCTGGCAGGGAAGGAAAGAACT

TGCATGTTGGTGAAGGAAGAAGTGGGGTGGGACAACAGTGAAATCT

MTVLPLSHQRRTDNEGRDCLSHLSIWLKERTCMLVKEEVGWDNSEI

**Coding potential calculator (CPC) analysis**

| #ID               | Length | C/NC | CODING POTENTIAL SCORE |
|-------------------|--------|------|------------------------|
| ENST00000415187.1 | 617    | NC   | 1.01895                |

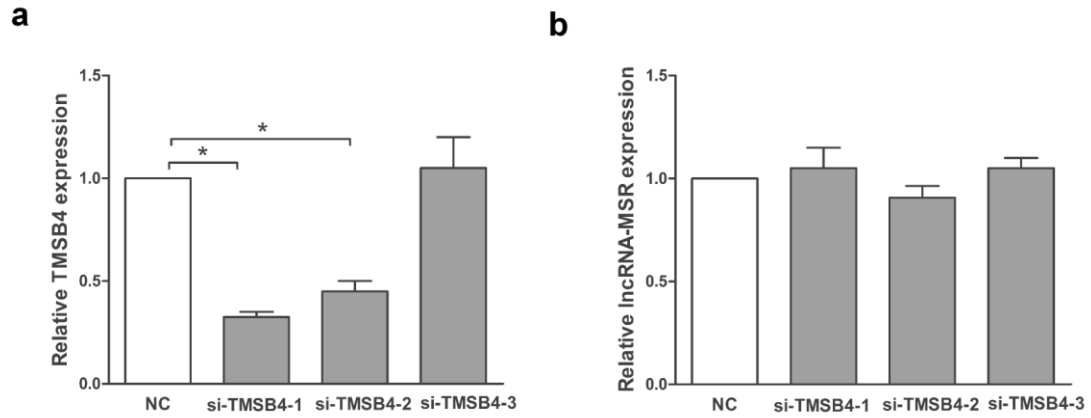

**Supplementary figure 3.** The effect of 3 different small interfering RNAs (siRNAs) against TMSB4 (si-TMSB4) was analyzed using qPCR. The greatest inhibition was achieved using si-TMSB4-1. The results are shown as the mean  $\pm$  S.E.M. of at least three independent experiments (\* $p < 0.05$ , \*\* $p < 0.01$ ).

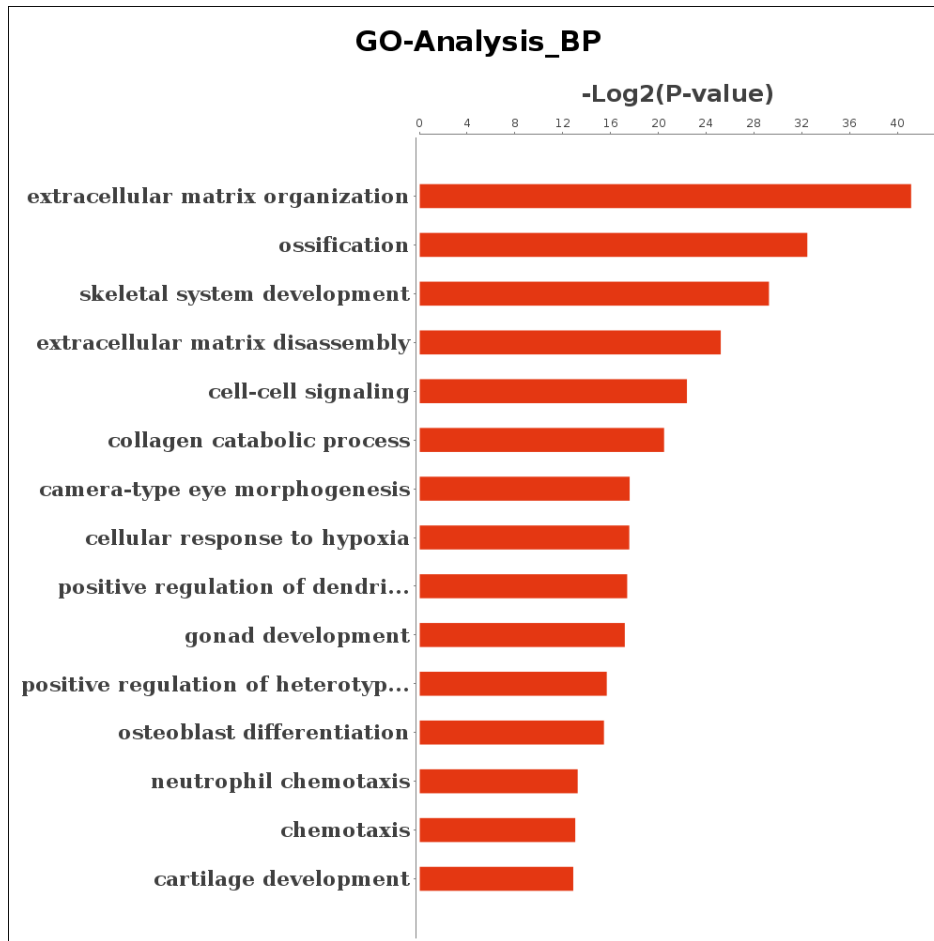

**Supplementary figure 4.** Gene ontology (GO) analysis of differentially expressed mRNAs.

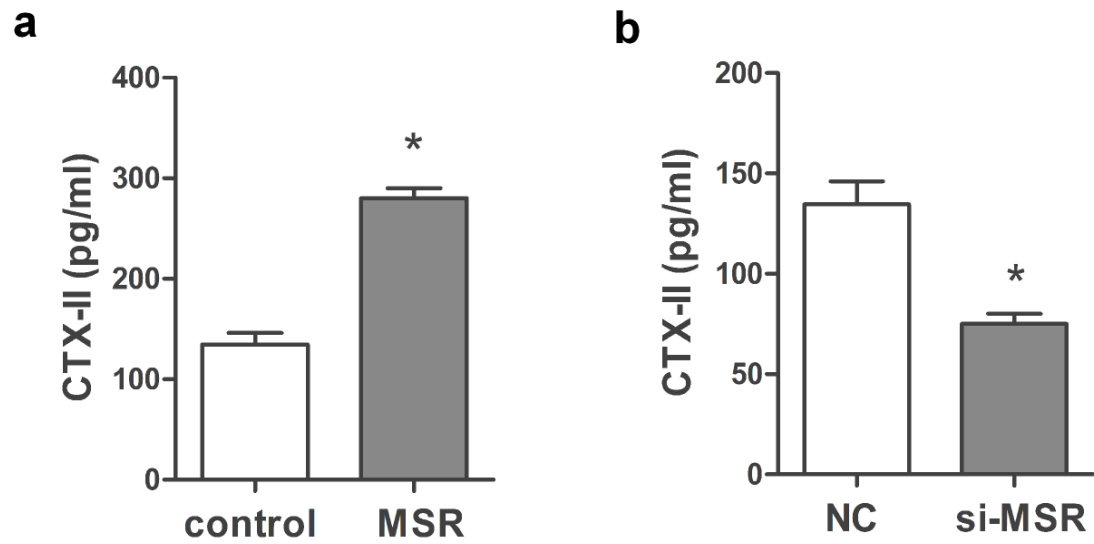

**Supplementary figure 5. Figure 3.** The effects of lncRNA-MSR on COL2 degradation. The releases of CTX-II was detected by ELISA in chondrocyte supernates. (\* $p < 0.05$ , \*\* $p < 0.01$  MSR vs. control (treated with empty plasmid) and si-MSR vs. the negative control (NC) siR-Ribo™)

**Supplementary Table 1** Differentially Expressed LncRNAs in damage versus intact Cartilage

| <b>seqname</b>           | <b>FCAbsolute</b> | <b>regulation</b> | <b>p-value</b> |
|--------------------------|-------------------|-------------------|----------------|
| AL359062                 | 13.460988         | up                | 4.409E-07      |
| chr10:127700955-27703336 | 12.114503         | up                | 3.513E-07      |
| ENST00000424567          | 9.35231           | up                | 5.604E-07      |
| AK023660                 | 9.072498          | up                | 6.631E-05      |
| ENST00000415187          | 8.803992          | up                | 1.099E-07      |
| AK001058                 | 8.413234          | up                | 1.02E-05       |
| NR_026812                | 7.6083255         | up                | 5.546E-08      |
| ENST00000335179          | 7.2754674         | up                | 1.297E-07      |
| AK027294                 | 6.239118          | up                | 6.121E-05      |
| uc003mjv.3               | 6.1100416         | up                | 1.107E-06      |
| ENST00000425396          | 6.046882          | up                | 2.155E-05      |
| CR612530                 | 5.2172318         | up                | 1.92E-06       |
| ENST00000504601          | 5.1720085         | up                | 1.704E-07      |
| uc010bkj.1               | 4.987715          | up                | 0.0095873      |
| ENST00000402383          | 4.940405          | up                | 0.0008607      |
| ENST00000330974          | 4.880104          | up                | 3.967E-08      |
| uc.75-                   | 4.753704          | up                | 0.0001294      |
| ENST00000444114          | 4.384677          | up                | 0.0001165      |
| BC012900                 | 4.0893803         | up                | 0.0001641      |
| BC007804                 | 4.0862594         | up                | 4.148E-06      |

| <b>seqname</b>  | <b>FCAbsolute</b> | <b>regulation</b> | <b>p-value</b> |
|-----------------|-------------------|-------------------|----------------|
| ENST00000507684 | 4.0651827         | up                | 2.859E-05      |
| M31164          | 4.0559654         | up                | 5.449E-05      |
| HIT000325634    | 3.962266          | up                | 6.528E-06      |
| ENST00000429872 | 3.9293466         | up                | 1.899E-05      |
| HIT000221810_03 | 3.9100006         | up                | 0.0005118      |
| ENST00000433189 | 3.794659          | up                | 0.0004558      |
| NR_024418       | 3.7814727         | up                | 2.473E-06      |
| ENST00000339991 | 3.717557          | up                | 0.005656       |
| uc003fdu.2      | 3.7065198         | up                | 0.0025347      |
| ENST00000420610 | 3.588953          | up                | 0.0002368      |
| NR_002734       | 3.5888178         | up                | 1.769E-07      |
| ENST00000405027 | 3.55626           | up                | 0.002284       |
| ENST00000447905 | 3.5138977         | up                | 0.0010476      |
| ENST00000441503 | 3.5125437         | up                | 0.0024442      |
| uc002uku.2      | 3.4596043         | up                | 0.0001717      |
| AK093691        | 3.396048          | up                | 0.004957       |
| ENST00000432950 | 3.3675792         | up                | 0.0006702      |
| AY927440        | 3.327262          | up                | 1.791E-06      |
| uc002kmd.1      | 3.2933195         | up                | 0.0012249      |
| AB007969        | 3.2462077         | up                | 0.0007498      |
| NR_002206       | 3.2148077         | up                | 0.0033122      |



| <b>seqname</b>  | <b>FCAbsolute</b> | <b>regulation</b> | <b>p-value</b> |
|-----------------|-------------------|-------------------|----------------|
| ENST00000505780 | 3.1980696         | up                | 0.0008557      |
| ENST00000415070 | 3.1871753         | up                | 1.893E-06      |
| NR_033397       | 3.1822324         | up                | 0.0038331      |
| CR602937        | 3.1793706         | up                | 1.088E-05      |
| nc-HOXD4-32+    | 3.1539834         | up                | 0.0045857      |
| NR_015421       | 3.1516075         | up                | 0.0006931      |
| ENST00000413496 | 3.1389694         | up                | 3.895E-05      |
| uc010fsr.1      | 3.0658016         | up                | 0.0001031      |
| ENST00000413189 | 3.0206683         | up                | 0.0119237      |
| ENST00000491506 | 3.005056          | up                | 0.0007321      |
| ENST00000441087 | 656.05615         | down              | 8.402E-10      |
| NR_001564       | 11.873753         | down              | 3.834E-07      |
| AK054860        | 7.9787536         | down              | 2.317E-05      |
| uc010mak.1      | 6.6142535         | down              | 1.514E-06      |
| AK091342        | 5.6048613         | down              | 7.225E-06      |
| nc-HOXA13-96-   | 5.374643          | down              | 0.0002649      |
| ENST00000502532 | 5.271958          | down              | 4.591E-06      |
| AK023939        | 5.136248          | down              | 5.815E-06      |
| BC015134        | 5.025621          | down              | 1.327E-05      |
| ENST00000418076 | 4.6331863         | down              | 1.089E-05      |
| AW086055        | 4.478261          | down              | 2.331E-05      |

| <b>seqname</b>  | <b>FCAbsolute</b> | <b>regulation</b> | <b>p-value</b> |
|-----------------|-------------------|-------------------|----------------|
| AK122798        | 4.3646903         | down              | 4.607E-05      |
| G43333          | 4.2439556         | down              | 6.003E-05      |
| uc011lrg.1      | 4.221657          | down              | 0.0003047      |
| ENST00000430908 | 4.2169766         | down              | 4.371E-06      |
| NR_023390       | 4.2151723         | down              | 0.0001027      |
| CR623725        | 4.134982          | down              | 6.748E-07      |
| ENST00000445028 | 4.024826          | down              | 0.0011247      |
| CR624187        | 3.9997923         | down              | 0.0002249      |
| uc002pez.1      | 3.9726923         | down              | 0.0008609      |
| CR625008        | 3.9617515         | down              | 0.000142       |
| uc.455-         | 3.9576786         | down              | 0.0011496      |
| BE244504        | 3.9407763         | down              | 0.0037609      |
| ENST00000472521 | 3.8614979         | down              | 0.0024879      |
| AK126122        | 3.7393925         | down              | 6.355E-05      |
| L38936          | 3.7110775         | down              | 0.0001744      |
| NR_003569       | 3.7005436         | down              | 0.0004253      |
| AK001910        | 3.674887          | down              | 0.0002842      |
| ENST00000504159 | 3.6549437         | down              | 6.671E-05      |
| AF086011        | 3.6325026         | down              | 0.0001276      |
| BC037328        | 3.6017063         | down              | 0.0004227      |
| uc002tzb.1      | 3.587518          | down              | 4.994E-05      |

| <b>seqname</b>  | <b>FCAbsolute</b> | <b>regulation</b> | <b>p-value</b> |
|-----------------|-------------------|-------------------|----------------|
| ENST00000466433 | 3.5284057         | down              | 0.0075607      |
| BC014215        | 3.4681048         | down              | 0.0002933      |
| CR624823        | 3.4392068         | down              | 7.776E-07      |
| ENST00000419236 | 3.408787          | down              | 0.0003479      |
| NR_027046       | 3.408307          | down              | 0.0002762      |
| uc003ijq.1      | 3.3813746         | down              | 0.0001375      |
| ENST00000434161 | 3.3780022         | down              | 0.0007826      |
| BC043279        | 3.2801988         | down              | 0.0026941      |
| NR_003191       | 3.2629626         | down              | 9.356E-05      |
| AK025239        | 3.2476842         | down              | 0.0061064      |
| AK096041        | 3.2438555         | down              | 0.00013        |
| ENST00000445125 | 3.2079            | down              | 0.0038801      |
| G43148          | 3.1514513         | down              | 0.0008997      |
| BC004287        | 3.146547          | down              | 3.361E-05      |
| BC071787        | 3.144896          | down              | 0.0006328      |
| HIT000067356    | 3.0885594         | down              | 9.27E-05       |
| NR_024368       | 3.085478          | down              | 0.0001585      |
| NR_003551       | 3.0842688         | down              | 0.0001916      |
| NR_026989       | 3.0833495         | down              | 0.0003147      |
| NR_024464       | 3.0403361         | down              | 0.002204       |
| NR_015392       | 3.0273528         | down              | 1.259E-05      |

---

| <b>seqname</b> | <b>FCAbsolute</b> | <b>regulation</b> | <b>p-value</b> |
|----------------|-------------------|-------------------|----------------|
| uc003hto.2     | 3.0184765         | down              | 0.001565       |

---

## Supplementary Table 2

|       |     |                                                                                                                   |     |
|-------|-----|-------------------------------------------------------------------------------------------------------------------|-----|
| Query | 1   | GACAAC <b>T</b> C <b>G</b> GTGGTGGCCACT <b>G</b> CGCAGACCAGACTTCGCTCGT <b>A</b> CTCG <b>T</b> <b>G</b> CGCCTCGCTT | 60  |
| Sbjct | 1   | GACAAC <b>T</b> CAGTGGTGGCCACTACGCAGACCAGACTTCGCTCGT <b>T</b> CTCGCGTGCCTCGCTC                                    | 60  |
| Query | 61  | CGCTT <b>T</b> TCCTCC <b>G</b> CAACCATGTCTGACAA <b>C</b> CCGATATGGCTGAGATCGAGAAATTCGAT                            | 120 |
| Sbjct | 61  | CGCTTCTCCTCCGTAACCATGTCTGACAAATCCGATATGGCTGAGATCGAGAAATTCGAT                                                      | 120 |
| Query | 121 | AAGTCGAAACTGAAGAAGACAGAGACGCAAGAGAAAAATCCACTGCCTTCCAAAGAAACG                                                      | 180 |
| Sbjct | 121 | AAGTCGAAACTGAAGAAGACAGAGACGCAAGAGAAAAATCCACTGCCTTCCAAAGAAACG                                                      | 180 |
| Query | 181 | ATTGAACAGGAGAAGCAAGCAGGCGAATCGTAATGAGGCGT <b>G</b> CGCC <b>G</b> CAATATGCACTG                                     | 240 |
| Sbjct | 181 | ATTGAACAGGAGAAGCAAGCAGGCGAATCGTA <b>ATGAGGCGTGTGCCGTC</b> AAATATGCACTG                                            | 240 |
| Query | 241 | TACATTCCACAAGCATTGCCTTCTTATTTACTTCTTTAGCTGTTAACT <b>T</b> TGTAAGAT                                                | 300 |
| Sbjct | 241 | TACATTCCACAAGCATTGCCTTCTTATTTACTTCTTTAGCTGTTAACTCTGTAAGAT                                                         | 300 |
| Query | 301 | GCAAAGAGGTTGGATCAAGTTTAAATGACTGTGCTGCCCTTTACATCAAAGA <b>ACTACT</b>                                                | 360 |
| Sbjct | 301 | GCAAAGAGGTTGGATCAAGTTTAAATGACTGTGCTGCCCTTTACATCAAAGAACTACT                                                        | 360 |
| Query | 361 | <b>GACAACGAAGGCCGCG</b> CCTGCCT <b>T</b> <b>CCCATCTGTCTATCTATCT</b> GGCTGGCAGGGAAGGA                              | 420 |
| Sbjct | 361 | GACAACGAAGGCCGCGACTGCCTCTCCCATCTG----TCTATCTGGCTGGCAGGGAAGGA                                                      | 416 |
| Query | 421 | AAGAACTGTCATGTTGGTGAAGGAAGAAGTGGGGTGA <b>AGAAGTGGGGTGGACGACAGT</b>                                                | 480 |
| Sbjct | 417 | AAGAACTGTCATGTTGGTGAAGGAAGAAGTGGGGTGG--GAC-----A--ACAGT                                                           | 462 |
| Query | 481 | <b>GAAATCTA</b> GA <b>G</b> TAAAACCAAGCTGGCCCAAGGTGCTCTGCAGGCTGTAATGCAGTTTAAT                                     | 540 |
| Sbjct | 463 | GAAATCTAAAGTAAAACCAAGCTGGCCCAAGGTGCTCTGCAGGCTGTAATGCAGTTTAAT                                                      | 522 |
| Query | 541 | CAGAGTGCCATTTTTTT <b>T</b> <b>T</b> TTGTTCAAATGATTTTAATTATTGGAATGCACAATTTTT                                       | 598 |
| Sbjct | 523 | CAGAGTGCCATTTTTTTCTTGTGTTCAAATGATTTTAATTATTGGAATGCACAATTTTT                                                       | 582 |

```
Query 599 TTAATATGCAAATAAAAAGTTTAAAAACTTAAAA 633 TMSB4X
Sbjct 583 TAAATATGCAAATAAAAAGTTTAAAAACTTAAAA 617 TMSB4X pseudogene lncRNA
```

The text in blue indicated the specific PCR probes, and the text in red indicated the specific siRNAs on the sequence alignment.
